# Supplementary material for: Mapping thalamocortical functional connectivity with large-scale brain networks in patients with first-episode psychosis
Source: Research Square preprint supplement (doi:10.21203/rs.3.rs-453773/v1), 2021-04-26
Supplement: Supplementary file 1 [file 10023436d95dc73105e50ed9.docx]

Supplementary figure S1. The results of the rest of independent components and the associated thalamic subdivisions.
